# Supplementary material
Source: PubMed Central journal article supplement (PMC4068674)
Supplement: AEM.00737-14_zam999105482so1.pdf [file AEM.00737-14_zam999105482so1.pdf]

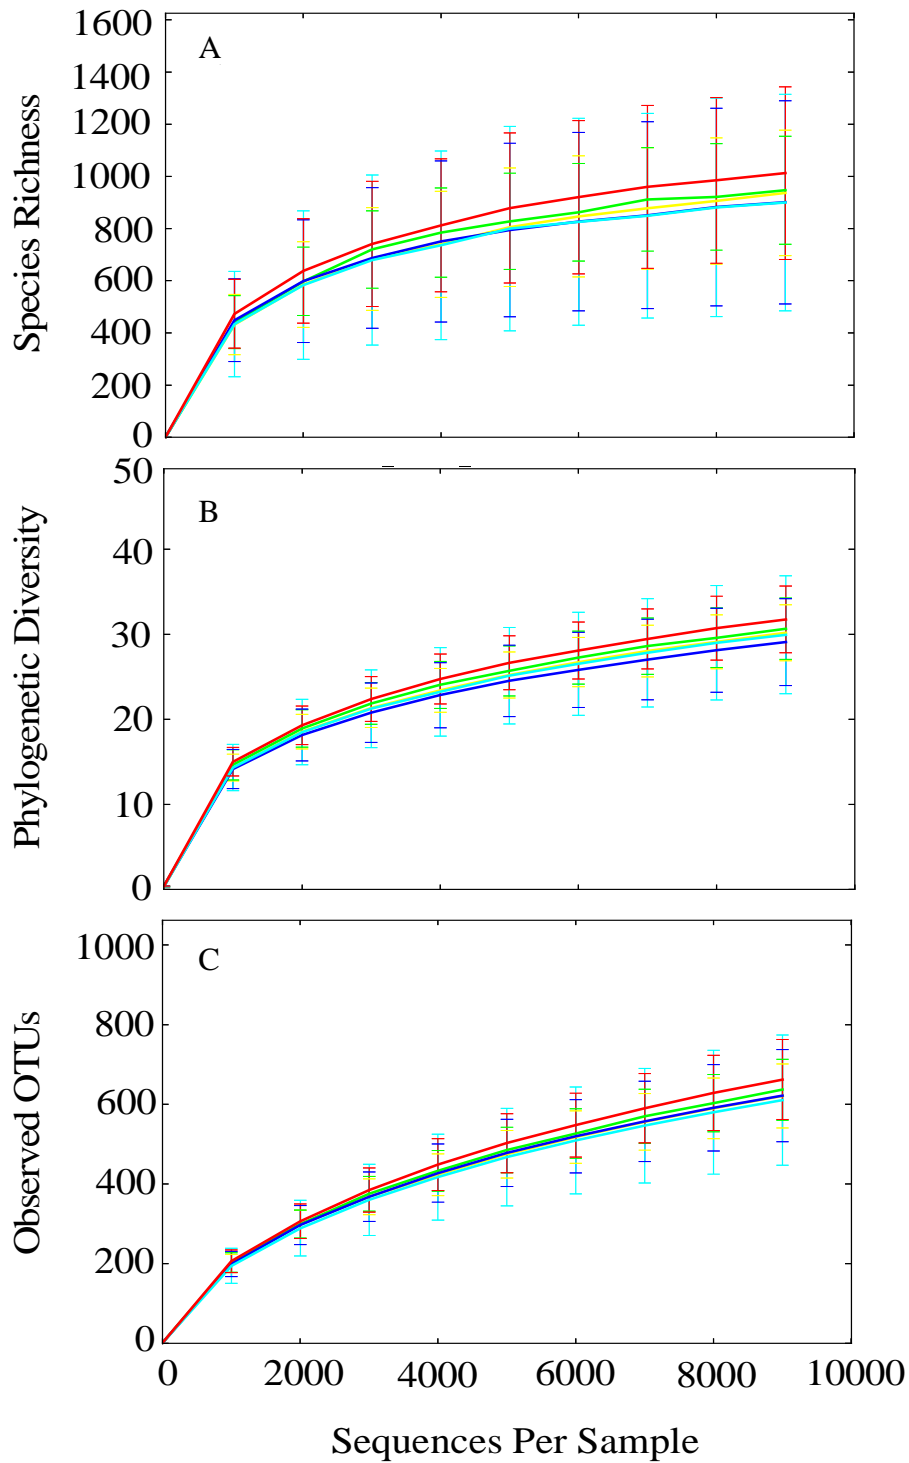

Supplementary Figure 1: Alpha diversity rarefaction plots sorted by sample period. A) Chao1, B) PD whole tree and C) Observed OTUs. Each line represents the alpha diversity at a sample period across the active season. Each point in the curve represents the mean value  $\pm$  the standard error. Symbols are: weaning (red), 4-weeks post (blue), 6-weeks post (green), 8-weeks post (yellow) and 10-weeks post (teal). Letters indicate a statistical difference among litters. Rarefaction plots were produced in QIIME 1.6.0

Supplemental  
Figure 2

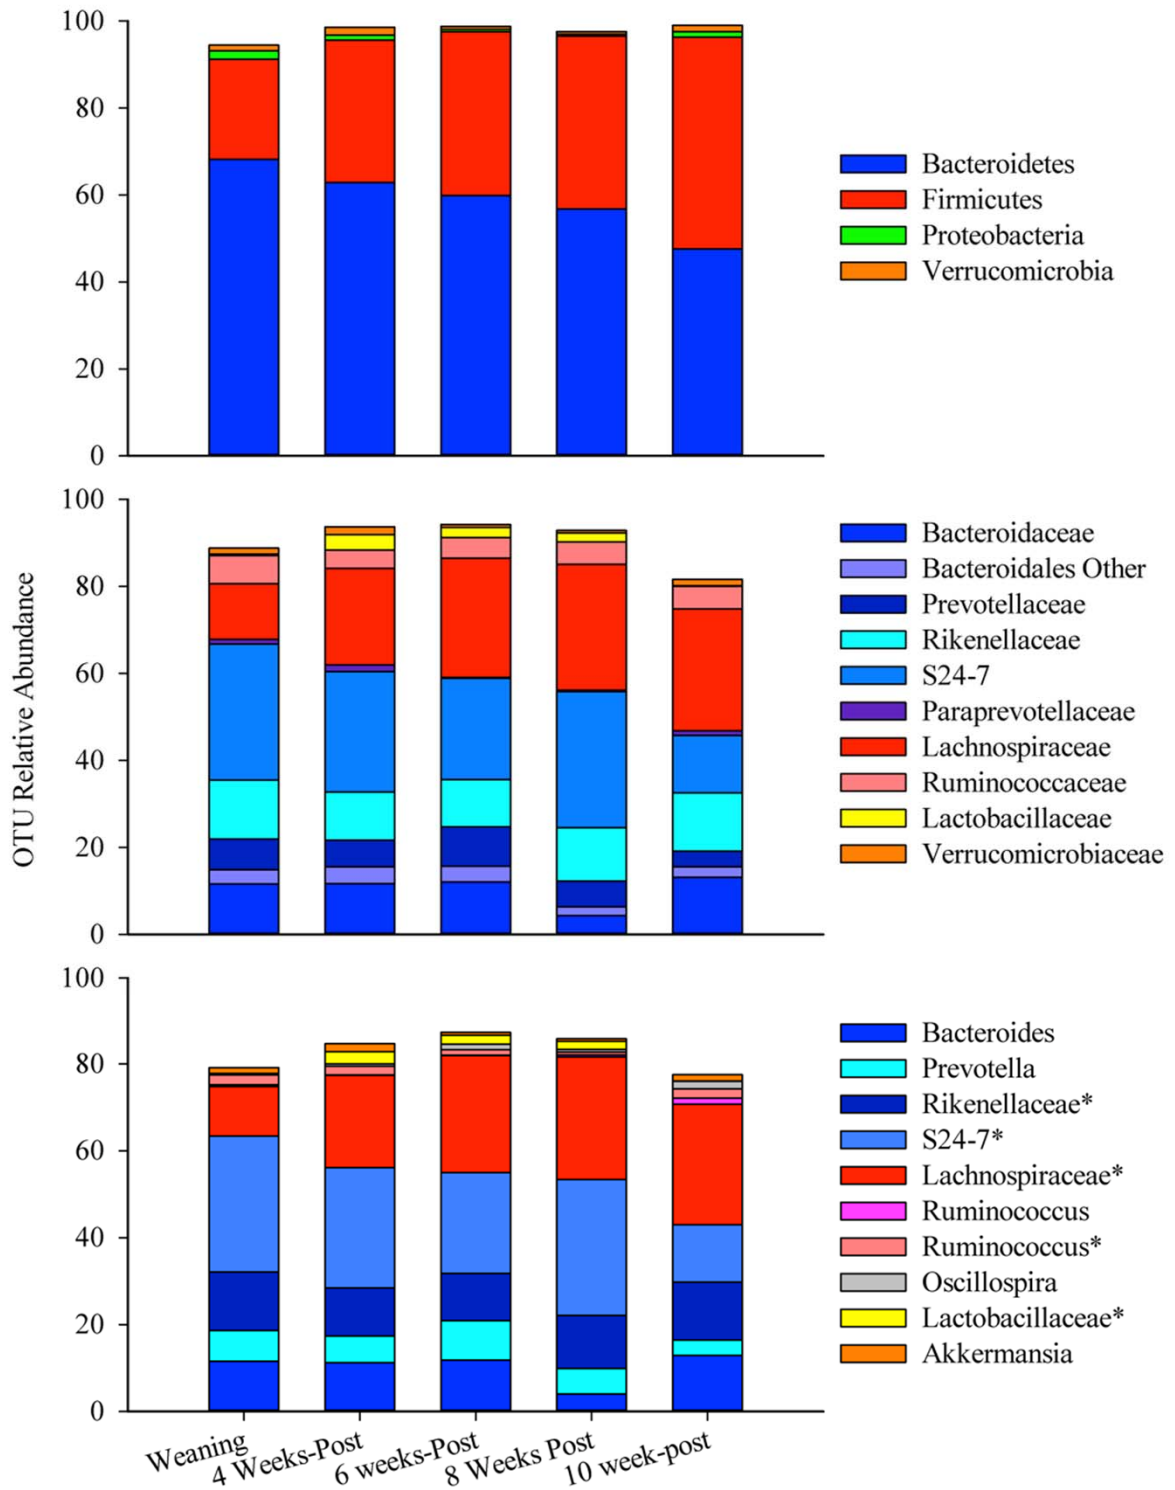

Supplemental Figure 2: Relative abundance of the dominant taxa. Bar stacks are the mean abundance of a particular bacterial assignment at a given sample point. Values coincide with the number values listed in Supplementary Table 1. Taxa with abundances less than 1% were not included. \* represented unclassified families or genera.

Supplementary Table 1: The relative abundances of the dominant taxa.

| Level  | Taxonomy                          | Weaning<br>(n=5) | 4-Weeks Post<br>(n=5) | 6-Weeks Post<br>(n=5) | 8-Weeks Post<br>(n=4) | 10-Weeks Post<br>(n=4) |
|--------|-----------------------------------|------------------|-----------------------|-----------------------|-----------------------|------------------------|
|        | <i>Bacteroidetes</i>              | 68.21 ± 3.70     | 62.88 ± 10.30         | 59.88 ± 8.80          | 56.79 ± 13.70         | 47.59 ± 4.90           |
|        | <i>Firmicutes</i>                 | 23.02 ± 5.09     | 32.74 ± 10.60         | 37.68 ± 9.20          | 39.78 ± 14.80         | 48.59 ± 5.40           |
|        | <i>Verrucomicrobia</i>            | 1.34 ± 0.57      | 1.84 ± 0.81           | 0.69 ± 0.37           | 0.61 ± 0.07           | 1.46 ± 0.97            |
|        | <i>Proteobacteria</i>             | 1.89 ± 0.57      | 1.12 ± 0.32           | 0.51 ± 0.30           | 0.38 ± 0.22           | 1.25 ± 0.09            |
| Class  | <i>Bacteroidia</i>                | 68.15 ± 3.70     | 62.84 ± 10.60         | 59.81 ± 8.40          | 56.74 ± 13.70         | 47.52 ± 5.00           |
|        | <i>Clostridia</i>                 | 22.47 ± 3.60     | 29.09 ± 10.50         | 35.02 ± 8.80          | 37.48 ± 14.20         | 39.68 ± 8.00           |
|        | <i>Bacilli</i>                    | 0.48 ± 0.29      | 3.57 ± 1.70           | 2.55 ± 0.57           | 2.23 ± 1.10           | 0.01 ± 0.01            |
|        | <i>Verrucomicrobiae</i>           | 1.34 ± 0.57      | 1.84 ± 0.81           | 0.69 ± 0.37           | 0.61 ± 0.07           | 1.46 ± 0.97            |
|        | <i>Alphaproteobacteria</i>        | 1.12 ± 0.53      | 0.83 ± 0.27           | 0.37 ± 0.08           | 0.14 ± 0.05           | 0.70 ± 0.28            |
| Order  | <i>Bacteroidales</i>              | 68.15 ± 3.70     | 62.84 ± 10.60         | 59.81 ± 8.40          | 56.74 ± 13.70         | 47.52 ± 5.00           |
|        | <i>Clostridia</i> <sup>§</sup>    | 1.72 ± 0.82      | 1.68 ± 0.56           | 1.81 ± 0.59           | 2.28 ± 1.20           | 5.25 ± 2.30            |
|        | <i>Clostridiales</i>              | 20.46 ± 5.09     | 27.14 ± 10.3          | 33.06 ± 9.10          | 34.93 ± 14.60         | 33.96 ± 6.50           |
|        | <i>Lactobacillales</i>            | 0.48 ± 0.29      | 3.57 ± 1.70           | 2.55 ± 0.57           | 2.23 ± 1.10           | 0.01 ± 0.01            |
|        | <i>Verrucomicrobiales</i>         | 1.34 ± 0.57      | 1.84 ± 0.81           | 0.69 ± 0.37           | 0.61 ± 0.07           | 1.46 ± 0.97            |
| Family | <i>Bacteroidales</i> <sup>#</sup> | 3.23 ± 0.78      | 3.87 ± 1.53           | 3.58 ± 0.81           | 2.03 ± 0.60           | 2.38 ± 0.29            |
|        | <i>Bacteroidaceae</i>             | 11.62 ± 3.30     | 11.67 ± 3.50          | 12.07 ± 6.50          | 4.32 ± 1.20           | 13.17 ± 3.80           |
|        | <i>Rikenellaceae</i>              | 13.58 ± 2.40     | 11.08 ± 1.80          | 10.92 ± 1.90          | 12.27 ± 4.10          | 13.40 ± 1.10           |
|        | <i>S24-7</i>                      | 31.27 ± 5.50     | 27.68 ± 8.40          | 23.23 ± 6.90          | 31.31 ± 11.60         | 13.18 ± 4.60           |
|        | <i>Prevotellaceae</i>             | 7.08 ± 2.00      | 6.14 ± 2.30           | 9.07 ± 0.76           | 5.91 ± 2.20           | 3.59 ± 0.95            |
|        | <i>Lachnospiraceae</i>            | 12.77 ± 2.70     | 22.25 ± 9.10          | 27.43 ± 7.90          | 28.92 ± 13.10         | 28.01 ± 6.3            |
|        | <i>Ruminococcaceae</i>            | 6.51 ± 2.60      | 4.12 ± 1.20           | 4.67 ± 1.20           | 5.14 ± 1.40           | 5.14 ± 0.73            |

|       |                            |              |              |              |               |              |
|-------|----------------------------|--------------|--------------|--------------|---------------|--------------|
|       | <i>Lactobacillaceae</i>    | 0.32 ± 0.20  | 3.53 ± 0.00  | 2.37 ± 0.65  | 2.07 ± 0.97   | 0.18 ± 0.14  |
|       | <i>Verrucomicrobiaceae</i> | 1.34 ± 0.57  | 1.84 ± 0.81  | 0.69 ± 0.37  | 0.61 ± 0.07   | 1.46 ± 0.97  |
| Genus | <i>Bacteroides</i>         | 11.56 ± 3.30 | 11.23 ± 3.40 | 11.81 ± 6.40 | 3.98 ± 1.10   | 12.84 ± 3.90 |
|       | <i>Prevotella</i>          | 7.06 ± 2.00  | 6.13 ± 2.30  | 9.04 ± 0.80  | 5.90 ± 2.20   | 3.58 ± 1.10  |
|       | <i>S24-7*</i>              | 31.27 ± 5.50 | 27.68 ± 8.50 | 23.23 ± 6.90 | 31.31 ± 11.60 | 13.18 ± 0.94 |
|       | <i>Rikenellaceae*</i>      | 13.45 ± 2.40 | 11.04 ± 2.05 | 8.39 ± 1.40  | 6.21 ± 1.50   | 13.19 ± 4.50 |
|       | <i>Lactobacillaceae*</i>   | 0.31 ± 0.19  | 2.85 ± 1.50  | 2.04 ± 0.60  | 1.83 ± 0.90   | 0.01 ± 1.10  |
|       | <i>Lachnospiraceae*</i>    | 11.40 ± 2.10 | 21.30 ± 8.30 | 26.9 ± 7.70  | 28.2 ± 12.10  | 27.75 ± 6.90 |
|       | <i>Ruminococcus</i>        | 0.41 ± 0.10  | 0.07 ± 0.22  | 0.10 ± 0.05  | 0.05 ± 0.02   | 1.43 ± 0.23  |
|       | <i>Ruminococcaceae*</i>    | 2.3 ± 0.60   | 1.97 ± 0.23  | 1.22 ± 0.45  | 0.64 ± 0.22   | 2.13 ± 0.37  |
|       | <i>Oscillospira</i>        | 0.09 ± 0.05  | 0.5 ± 0.19   | 1.28 ± 0.50  | 0.60 ± 0.26   | 1.71 ± 0.38  |
|       | <i>Akkermansia</i>         | 1.34 ± 0.57  | 1.84 ± 0.81  | 0.69 ± 0.37  | 0.61 ± 0.07   | 1.46 ± 0.97  |

Values are the mean +/- the standard error. The values of this table coincide with Supplementary Figure 1.

\$ Represents unclassified orders

# Represents unclassified families

\* Represents unclassified genera.

Supplementary Table 2: The relative abundances of dominant taxa among litters.

|        | Taxonomy                          | 11-05<br>(n=5) | 11-12<br>(n=5) | 11-19<br>(n=5) | 11-13<br>(n=4) | 11-21<br>(n=4) |
|--------|-----------------------------------|----------------|----------------|----------------|----------------|----------------|
| Phylum | <i>Bacteroidetes</i>              | 35.27 ± 7.43   | 52.80 ± 6.58   | 66.82 ± 3.91   | 65.56 ± 7.33   | 74.21 ± 6.78   |
|        | <i>Firmicutes</i>                 | 61.28 ± 7.51   | 44.20 ± 6.99   | 29.89 ± 5.02   | 26.75 ± 8.79   | 19.69 ± 6.76   |
|        | <i>Proteobacteria</i>             | 1.85 ± 0.89    | 0.85 ± 0.35    | 0.77 ± 0.01    | 1.25 ± 0.29    | 1.78 ± 0.97    |
|        | <i>Verrucomicrobia</i>            | 0.21 ± 0.57    | 0.87 ± 0.30    | 1.02 ± 0.82    | 0.75 ± 0.28    | 2.98 ± 1.36    |
| Class  | <i>Bacteroidia</i>                | 35.21 ± 7.42   | 52.71 ± 6.61   | 66.75 ± 3.18   | 65.48 ± 8.18   | 74.18 ± 6.79   |
|        | <i>Clostridia</i>                 | 57.69 ± 6.73   | 43.54 ± 6.85   | 28.99 ± 2.88   | 15.14 ± 3.04   | 17.51 ± 7.27   |
|        | <i>Bacilli</i>                    | 3.48 ± 0.29    | 0.59 ± 0.21    | 0.81 ± 0.45    | 3.79 ± 2.05    | 2.05 ± 1.00    |
|        | <i>Verrucomicrobiae</i>           | 1.85 ± 0.89    | 0.85 ± 0.35    | 0.77 ± 0.01    | 1.25 ± 0.29    | 1.78 ± 0.97    |
|        | <i>Alphaproteobacteria</i>        | 0.16 ± 0.09    | 0.47 ± 0.11    | 0.56 ± 0.23    | 0.24 ± 1.04    | 1.04 ± 0.65    |
| Order  | <i>Bacteroidales</i>              | 35.21 ± 7.42   | 52.71 ± 6.61   | 66.75 ± 3.18   | 65.48 ± 8.18   | 74.18 ± 6.79   |
|        | <i>Clostridia</i> <sup>§</sup>    | 1.60 ± 0.45    | 2.95 ± 2.21    | 2.66 ± 0.87    | 1.15 ± 0.63    | 3.15 ± 1.01    |
|        | <i>Clostridiales</i>              | 55.88 ± 6.59   | 40.20 ± 5.94   | 26.12 ± 3.56   | 13.14 ± 2.64   | 14.24 ± 6.65   |
|        | <i>Lactobacillales</i>            | 3.22 ± 0.79    | 0.45 ± 0.14    | 0.81 ± 0.45    | 3.79 ± 2.50    | 2.05 ± 1.00    |
|        | <i>Verrucomicrobiales</i>         | 1.85 ± 0.89    | 0.85 ± 0.35    | 0.77 ± 0.01    | 1.25 ± 0.29    | 1.78 ± 0.97    |
| Family | <i>Bacteroidales</i> <sup>#</sup> | 2.59 ± 1.09    | 2.49 ± 0.46    | 2.93 ± 0.32    | 5.01 ± 1.72    | 2.71 ± 0.82    |
|        | <i>Bacteroidaceae</i>             | 3.11 ± 0.73    | 9.32 ± 2.93    | 17.24 ± 3.17   | 20.31 ± 4.32   | 4.04 ± 1.58    |
|        | <i>Rikenellaceae</i>              | 6.53 ± 1.18    | 15.63 ± 1.82   | 15.42 ± 1.54   | 6.77 ± 1.92    | 14.43 ± 3.01   |
|        | <i>S24-7</i>                      | 17.26 ± 4.81   | 15.79 ± 1.79   | 23.54 ± 3.60   | 22.18 ± 4.35   | 46.88 ± 9.11   |
|        | <i>Lachnospiraceae</i>            | 45.82 ± 8.70   | 32.00 ± 6.42   | 19.17 ± 3.15   | 10.17 ± 2.71   | 12.03 ± 5.49   |
|        | <i>Prevotellaceae</i>             | 4.99 ± 2.78    | 7.47 ± 1.84    | 6.52 ± 1.68    | 7.96 ± 2.23    | 5.54 ± 1.39    |
|        | <i>Ruminococcaceae</i>            | 8.69 ± 1.47    | 7.12 ± 0.58    | 5.83 ± 1.03    | 2.56 ± 1.16    | 1.63 ± 0.45    |

|       |                            |              |              |              |              |              |
|-------|----------------------------|--------------|--------------|--------------|--------------|--------------|
|       | <i>Lactobacillaceae</i>    | 3.14 ± 0.95  | 0.44 ± 0.14  | 0.72 ± 0.44  | 3.79 ± 2.50  | 2.04 ± 0.89  |
|       | <i>Verrucomicrobiaceae</i> | 1.85 ± 0.89  | 0.85 ± 0.35  | 0.77 ± 0.01  | 1.25 ± 0.29  | 1.78 ± 0.97  |
| Genus | <i>Bacteroides</i>         | 3.11 ± 0.65  | 9.04 ± 2.99  | 16.70 ± 3.23 | 20.14 ± 4.21 | 3.71 ± 1.76  |
|       | <i>Prevotella</i>          | 4.98 ± 2.48  | 7.46 ± 1.84  | 6.49 ± 1.67  | 7.93 ± 2.33  | 5.54 ± 1.55  |
|       | <i>S24-7*</i>              | 17.26 ± 4.81 | 15.79 ± 1.79 | 23.54 ± 3.60 | 22.18 ± 4.35 | 46.88 ± 9.11 |
|       | <i>Rikenellaceae*</i>      | 6.53 ± 1.18  | 15.63 ± 1.82 | 15.42 ± 1.54 | 6.77 ± 1.92  | 14.43 ± 3.01 |
|       | <i>Lactobacillaceae*</i>   | 2.64 ± 0.66  | 0.25 ± 0.15  | 0.69 ± 0.42  | 3.32 ± 2.17  | 1.70 ± 0.84  |
|       | <i>Lactobacillus</i>       | 0.43 ± 0.33  | 0.17 ± 0.11  | 0.02 ± 0.01  | 1.29 ± 1.70  | 0.30 ± 0.16  |
|       | <i>Lachnospiraceae*</i>    | 44.38 ± 7.93 | 30.54 ± 8.3  | 18.40 ± 7.7  | 9.99 ± 2.49  | 11.50 ± 2.62 |
|       | <i>Ruminococcus</i>        | 2.69 ± 0.56  | 1.97 ± 0.12  | 1.54 ± 0.49  | 0.42 ± 0.22  | 0.51 ± 0.31  |
|       | <i>Ruminococcaceae*</i>    | 4.20 ± 0.42  | 2.95 ± 0.23  | 1.95 ± 0.2   | 1.00 ± 0.49  | 0.38 ± 0.11  |
|       | <i>Akkermansia</i>         | 1.85 ± 0.89  | 0.85 ± 0.35  | 0.77 ± 0.01  | 1.25 ± 0.29  | 1.78 ± 0.97  |

Values are the mean +/- the standard error.

\$ Represents unclassified orders

# Represents unclassified families

\* Represents unclassified genera.
